# Supplementary material for: mmquant: how to count multi-mapping reads?
Source: PubMed Central journal article supplement (PMC5603007; doi:10.1186/s12859-017-1816-4), 2017-09-15
Supplement: 12859_2017_1816_MOESM2_ESM.pdf [file 12859_2017_1816_MOESM2_ESM.pdf]

**Table 1** List of differentially expressed merged genes, related with brain diseases.

| Merged gene | Gene Name         | ENSEMBL Name    | Locus                        |
|-------------|-------------------|-----------------|------------------------------|
| 1           | <i>ADK</i>        | ENSG00000156110 | 10:74,151,185-74,709,303 (+) |
|             | <i>MRPL35P3</i>   | ENSG00000226253 | 10:74,527,584-74,527,947 (+) |
|             | <i>AC022540.1</i> | ENSG00000232342 | 10:74,506,081-74,530,553 (-) |
| 2           | <i>HTRA2</i>      | ENSG00000115317 | 2:74,529,377-74,533,348 (+)  |
|             | <i>AUP1</i>       | ENSG00000115307 | 2:74,526,645-74,529,939 (-)  |
| 3           | <i>GTF2I</i>      | ENSG00000263001 | 7:74,657,667-74,760,692 (+)  |
|             | <i>AC211433.1</i> | ENSG00000232729 | 7:74,688,939-74,729,001 (-)  |
|             | <i>GTF2IP4</i>    | ENSG00000233369 | 7:73,154,938-73,207,283 (+)  |
| 4           | <i>hnRNP-A1</i>   | ENSG00000135486 | 12:54,280,193-54,287,088 (+) |
|             | <i>AC021224.1</i> | ENSG00000262477 | 18:32,412,182-32,413,236 (+) |
|             | <i>HNRNPA1P7</i>  | ENSG00000215492 | 18:32,412,214-32,413,176 (-) |
|             | <i>HNRNPA1P10</i> | ENSG00000214223 | 19:11,666,069-11,667,030 (-) |
| 5           | <i>PKD1</i>       | ENSG00000008710 | 16:2,088,710-2,135,898 (-)   |
|             | <i>PKD1P5</i>     | ENSG00000254681 | 16:18,374,521-18,401,940 (-) |
| 6           | <i>RERE</i>       | ENSG00000142599 | 1:8,352,397-8,817,643 (-)    |
|             | <i>AC025884.1</i> | ENSG00000258732 | 15:22,278,971-22,282,872 (+) |
